# Supplementary material for: Tuning luminescence via transition metal-directed strategy in coordination polymers
Source: Royal Society of Chemistry journal article supplement (doi:10.1039/c3ce42566e), 2014-01-01
Supplement: c3ce42566e1.pdf [file c3ce42566e1.pdf]

## Electronic Supplementary Information

### Tuning Luminescence via Transition Metal-Directed Strategy in Coordination Polymers

**Table S1.** Selected bond distances (Å) and angles (°) for compounds **1-6**.

| <b>1</b>            |            |                     |            |
|---------------------|------------|---------------------|------------|
| Cu(1)-N(2)          | 1.9746(16) | Cu(1)-N(3)          | 1.9806(16) |
| Cu(1)-O(1)#1        | 2.0086(10) | Cu(1)-O(1)          | 2.0086(10) |
| N(2)-Cu(1)-N(3)     | 180.000(1) | N(2)-Cu(1)-O(1)#1   | 87.56(3)   |
| N(3)-Cu(1)-O(1)#1   | 92.44(3)   | N(2)-Cu(1)-O(1)     | 87.56(3)   |
| N(3)-Cu(1)-O(1)     | 92.44(3)   | O(1)#1-Cu(1)-O(1)   | 175.12(5)  |
| <b>2</b>            |            |                     |            |
| Co(1)-O(5)#1        | 2.0818(14) | Co(1)-O(5)          | 2.0818(14) |
| Co(1)-O(2)          | 2.1211(13) | Co(1)-O(2)#1        | 2.1211(13) |
| Co(1)-N(2)#1        | 2.1550(16) | Co(1)-N(2)          | 2.1550(16) |
| O(5)#1-Co(1)-O(5)   | 180.0      | O(5)#1-Co(1)-O(2)   | 90.38(5)   |
| O(5)-Co(1)-O(2)     | 89.62(5)   | O(5)#1-Co(1)-O(2)#1 | 89.62(5)   |
| O(5)-Co(1)-O(2)#1   | 90.38(5)   | O(2)-Co(1)-O(2)#1   | 180.000(1) |
| O(5)#1-Co(1)-N(2)#1 | 95.04(6)   | O(5)-Co(1)-N(2)#1   | 84.96(6)   |
| O(2)-Co(1)-N(2)#1   | 88.33(6)   | O(2)#1-Co(1)-N(2)#1 | 91.67(6)   |
| O(5)#1-Co(1)-N(2)   | 84.96(6)   | O(5)-Co(1)-N(2)     | 95.04(6)   |
| O(2)-Co(1)-N(2)     | 91.67(6)   | O(2)#1-Co(1)-N(2)   | 88.33(6)   |
| N(2)#1-Co(1)-N(2)   | 180.000(1) |                     |            |
| <b>3</b>            |            |                     |            |
| Mn(1)-O(5)          | 2.0812(18) | Mn(1)-O(5)#1        | 2.0812(18) |
| Mn(1)-O(1)#1        | 2.1193(17) | Mn(1)-O(1)          | 2.1193(17) |
| Mn(1)-N(2)          | 2.156(2)   | Mn(1)-N(2)#1        | 2.156(2)   |
| O(5)-Mn(1)-O(5)#1   | 180.000(1) | O(5)-Mn(1)-O(1)#1   | 90.45(7)   |
| O(5)#1-Mn(1)-O(1)#1 | 89.55(7)   | O(5)-Mn(1)-O(1)     | 89.55(7)   |
| O(5)#1-Mn(1)-O(1)   | 90.45(7)   | O(1)#1-Mn(1)-O(1)   | 180.000(1) |
| O(5)-Mn(1)-N(2)     | 95.07(8)   | O(5)#1-Mn(1)-N(2)   | 84.93(8)   |
| O(1)#1-Mn(1)-N(2)   | 88.34(8)   | O(1)-Mn(1)-N(2)     | 91.66(8)   |
| O(5)-Mn(1)-N(2)#1   | 84.93(8)   | O(5)#1-Mn(1)-N(2)#1 | 95.07(8)   |
| O(1)#1-Mn(1)-N(2)#1 | 91.66(8)   | O(1)-Mn(1)-N(2)#1   | 88.34(8)   |
| N(2)-Mn(1)-N(2)#1   | 180.000(1) |                     |            |
| <b>4</b>            |            |                     |            |
| Ag(1)-N(3)          | 2.1590(19) | Ag(1)-N(2)          | 2.1672(19) |
| Ag(1)-O(2)          | 2.5561(17) | Ag(1)-Ag(1)#1       | 3.1618(4)  |
| N(3)-Ag(1)-N(2)     | 166.08(7)  | N(3)-Ag(1)-O(2)     | 91.40(6)   |
| N(2)-Ag(1)-O(2)     | 92.71(6)   | N(3)-Ag(1)-Ag(1)#1  | 78.76(5)   |
| N(2)-Ag(1)-Ag(1)#1  | 114.90(5)  | O(2)-Ag(1)-Ag(1)#1  | 83.82(4)   |
| <b>5</b>            |            |                     |            |

|                     |            |                     |            |
|---------------------|------------|---------------------|------------|
| Cd(1)-N(1)          | 2.2034(18) | Cd(1)-N(2)          | 2.3278(17) |
| Cd(1)-O(5)          | 2.3283(17) | Cd(1)-N(3)          | 2.3419(17) |
| Cd(1)-O(2)#1        | 2.3774(14) | Cd(1)-O(1)#1        | 2.4173(15) |
| Cd(1)-C(7)#1        | 2.725(2)   | N(1)-Cd(1)-N(2)     | 109.87(7)  |
| N(1)-Cd(1)-O(5)     | 84.88(7)   | N(2)-Cd(1)-O(5)     | 88.11(7)   |
| N(1)-Cd(1)-N(3)     | 103.90(6)  | N(2)-Cd(1)-N(3)     | 95.11(6)   |
| O(5)-Cd(1)-N(3)     | 168.89(7)  | N(1)-Cd(1)-O(2)#1   | 93.41(6)   |
| N(2)-Cd(1)-O(2)#1   | 156.29(6)  | O(5)-Cd(1)-O(2)#1   | 89.57(7)   |
| N(3)-Cd(1)-O(2)#1   | 83.21(6)   | N(1)-Cd(1)-O(1)#1   | 146.38(6)  |
| N(2)-Cd(1)-O(1)#1   | 101.21(6)  | O(5)-Cd(1)-O(1)#1   | 83.62(7)   |
| N(3)-Cd(1)-O(1)#1   | 85.33(6)   | O(2)#1-Cd(1)-O(1)#1 | 55.09(5)   |
| N(1)-Cd(1)-C(7)#1   | 120.46(6)  | N(2)-Cd(1)-C(7)#1   | 128.84(6)  |
| O(5)-Cd(1)-C(7)#1   | 87.73(7)   | N(3)-Cd(1)-C(7)#1   | 81.96(6)   |
| O(2)#1-Cd(1)-C(7)#1 | 27.45(6)   | O(1)#1-Cd(1)-C(7)#1 | 27.72(6)   |
| <b>6</b>            |            |                     |            |
| Zn(1)-O(2)#1        | 1.9418(16) | Zn(1)-N(1)          | 1.950(2)   |
| Zn(1)-N(2)          | 2.0690(19) | Zn(1)-N(3)          | 2.1037(18) |
| O(2)-Zn(1)#2        | 1.9418(16) | O(2)#1-Zn(1)-N(1)   | 118.42(8)  |
| O(2)#1-Zn(1)-N(2)   | 108.31(8)  | N(1)-Zn(1)-N(2)     | 111.68(8)  |
| O(2)#1-Zn(1)-N(3)   | 100.78(7)  | N(1)-Zn(1)-N(3)     | 111.60(8)  |
| N(2)-Zn(1)-N(3)     | 104.74(8)  | C(7)-O(2)-Zn(1)#2   | 111.69(15) |
| S(1)-N(1)-Zn(1)     | 121.73(11) | Zn(1)-N(1)-H(1A)    | 119.1      |
| C(8)-N(2)-Zn(1)     | 121.11(15) | C(12)-N(2)-Zn(1)    | 121.70(16) |
| C(13)-N(3)-Zn(1)    | 120.05(15) | C(17)-N(3)-Zn(1)    | 122.65(15) |

Symmetry code for **1-6**: (#1)  $-x+1, y, -z+3/2$  for **1**; (#1)  $-x, -y+2, -z+1$  for **2**; (#1)  $-x, -y+2, -z+1$  for **3**; (#1)  $-x+1, -y+1, -z+1$  for **4**; (#1)  $-x, -y+2, -z+2$  for **5**; (#1)  $-x-1/2, y-1/2, -z-1/2$ , (#2)  $-x-1/2, y+1/2, -z-1/2$  for **6**.

**Table S2.** Hydrogen-bonding parameters (Å, °) for compounds **1-4**.

| D-H...A                         | <i>d</i> (D-H) | <i>d</i> (H...A) | <i>d</i> (D...A) | ∠(D-H...A) |
|---------------------------------|----------------|------------------|------------------|------------|
| <b>1</b>                        |                |                  |                  |            |
| N(1)-H(1A)...O(2) <sup>a</sup>  | 0.86(2)        | 1.89(2)          | 2.7463(17)       | 174(2)     |
| N(1)-H(1B)...O(4) <sup>b</sup>  | 0.87(2)        | 2.16(2)          | 3.0279(19)       | 170(2)     |
| <b>2</b>                        |                |                  |                  |            |
| N(1)-H(1A)...O(4) <sup>a</sup>  | 0.86(3)        | 2.24(3)          | 3.004(3)         | 149(3)     |
| N(1)-H(1B)...O(1) <sup>b</sup>  | 0.81(4)        | 2.08(4)          | 2.854(3)         | 159(3)     |
| C(8)-H(8)...O(5) <sup>c</sup>   | 0.95(3)        | 2.46(3)          | 3.354(3)         | 158(2)     |
| C(11)-H(11)...O(3) <sup>d</sup> | 0.95(3)        | 2.59(3)          | 3.519(3)         | 167(3)     |
| <b>3</b>                        |                |                  |                  |            |
| N(1)-H(1A)...O(4) <sup>a</sup>  | 0.96(5)        | 2.16(5)          | 3.003(4)         | 147(4)     |
| N(1)-H(1B)...O(2) <sup>b</sup>  | 0.85(6)        | 2.05(6)          | 2.857(4)         | 161(5)     |
| C(8)-H(8)...O(5) <sup>c</sup>   | 0.95(4)        | 2.46(4)          | 3.354(4)         | 157(3)     |
| C(11)-H(11)...O(3) <sup>d</sup> | 0.97(4)        | 2.60(4)          | 3.519(4)         | 160(3)     |

| 4                            |         |         |          |        |
|------------------------------|---------|---------|----------|--------|
| N(1)–H(1A)⋯O(1) <sup>a</sup> | 0.77(3) | 2.09(3) | 2.843(3) | 165(4) |
| N(1)–H(1B)⋯O(4) <sup>b</sup> | 0.88(4) | 2.18(4) | 3.028(3) | 163(3) |
| C(5)–H(5)⋯O(2) <sup>c</sup>  | 0.89(4) | 2.44(4) | 3.226(3) | 147(3) |

Symmetry code for **1**: (a) 1-x, 1-y, 1-z, (b) 3/2-x, 1/2-y, 1-z; for **2**: (a) -1+x, y, z, (b) -x, 1-y, -z, (c) 1-x, 2-y, 1-z, (d) -1+x, y, 1+z; for **3**: (a) -1+x, y, z, (b) -x, 1-y, -z, (c) 1-x, 2-y, 1-z, (d) -1+x, y, 1+z; for **4**: (a) 2-x, -y, 1-z, (b) 3-x, -y, -z, (c) 1+x, y, z.

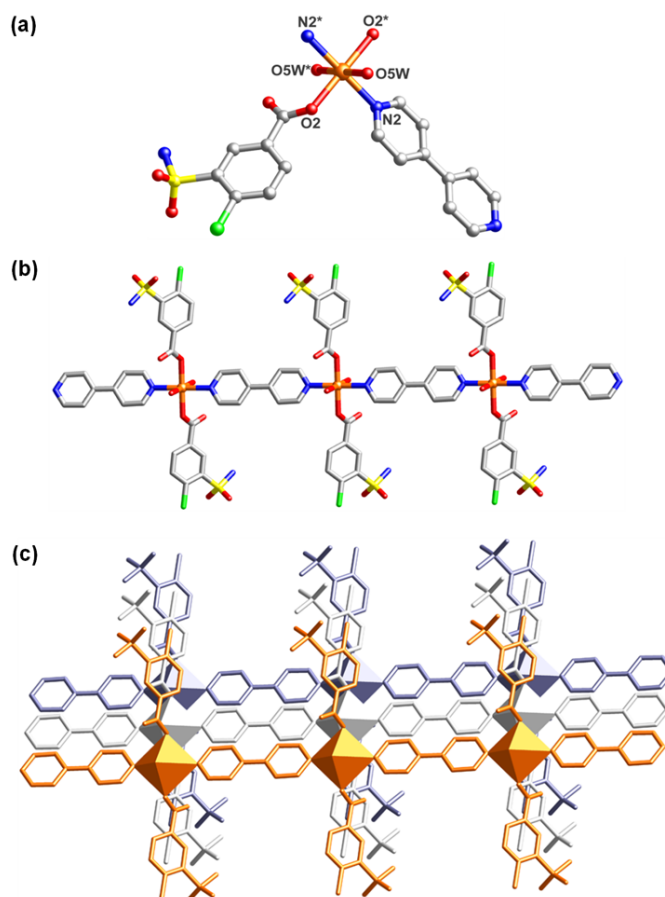

**Figure S1.** (a) Coordination environment of the M (M = Co or Mn) centre. Hydrogen atoms are omitted for clarity. (b) A drawing showing the 1D chain in **2** and **3**. (c) The 2D supramolecular arrangement formed via hydrogen interactions in **2** and **3**.

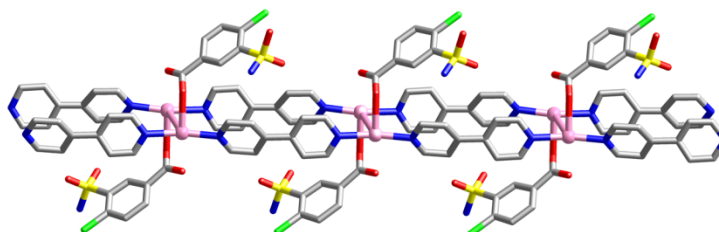

**Figure S2.** The monodentate coordinated H<sub>3</sub>L ligands served as side-arms hang on both sides of the ladder up and down.

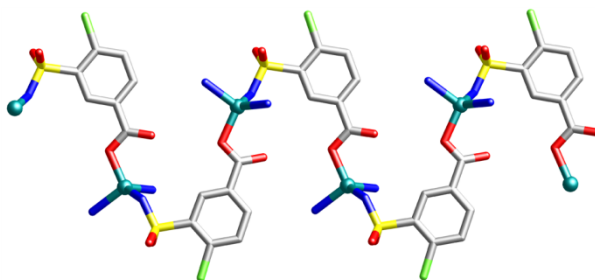

**Figure S3.** The 1D wave-like chain formed via H<sub>3</sub>L ligands between adjacent Zn atoms.

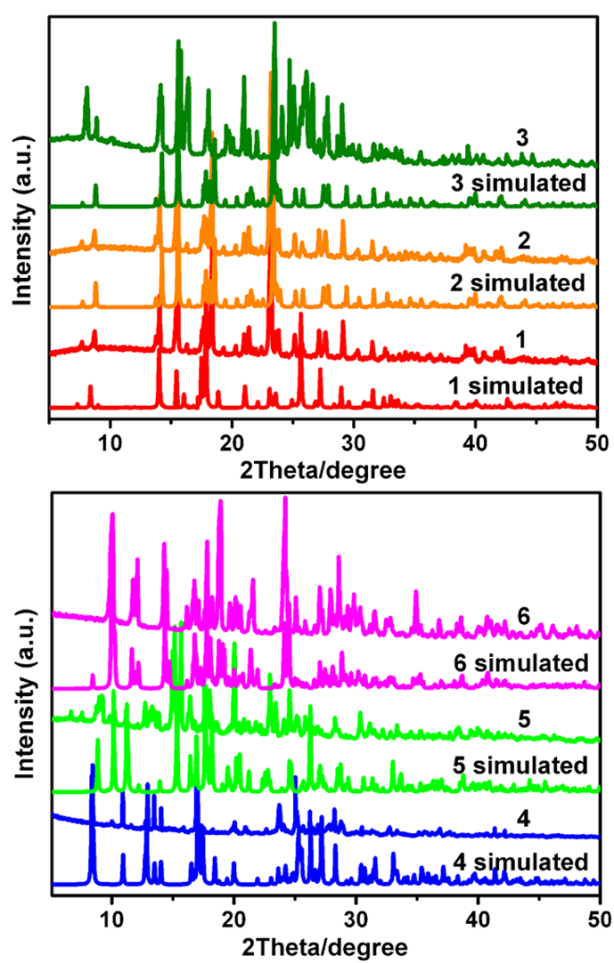

**Figure S4.** XRD spectra of compounds 1-6. Simulated (lower trace) and experimental (upper trace).

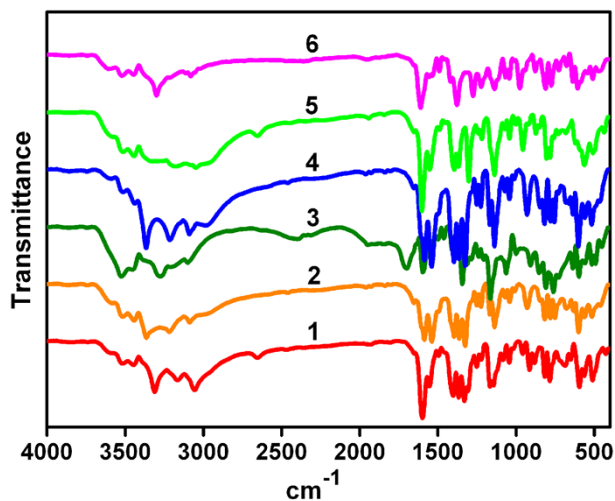

Figure S5. FT-IR spectra of compounds 1-6.

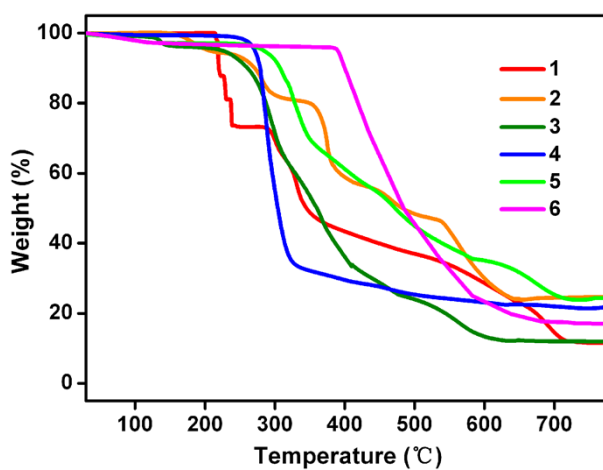

Figure S6. TG curves of compounds 1-6.

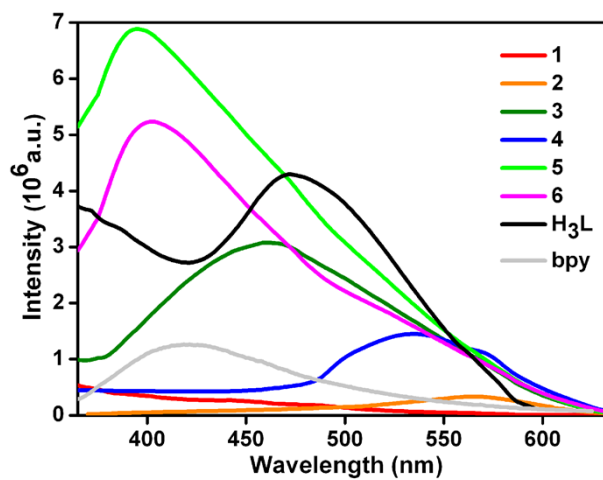

Figure S7. Solid-state photoluminescent spectra of free  $\text{H}_3\text{L}$ , bpy ligands and compounds 1-6.

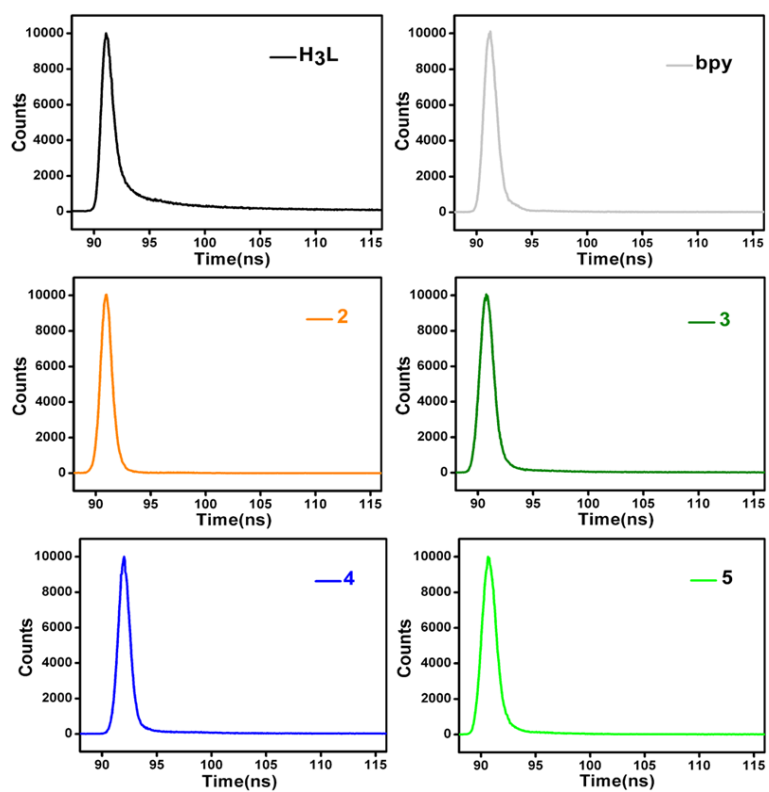

**Figure S8.** Fluorescence decay curves of compounds **2-5** as well as H<sub>3</sub>L and bpy ligands.
